# Supplementary material
Source: Springer Nature journal article supplement (https://www.springermedizin.de/resource/supplementary/12961_2012_264_MOESM4_ESM.pdf/9570920)

**TB Incidence and TB/Total R&D Expenditure (2010)**

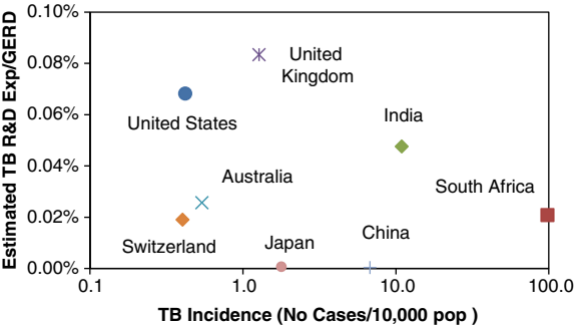

Supplement: MOESM4 [file 9570920]
